# Supplementary material for: Orientation epitaxy of Ge1−xSnxfilms grown on single crystal CaF2substrates
Source: Royal Society of Chemistry journal article supplement (doi:10.1039/c5ce02579f), 2016-01-01
Supplement: c5ce02579f1.pdf [file c5ce02579f1.pdf]

### Supplementary Information

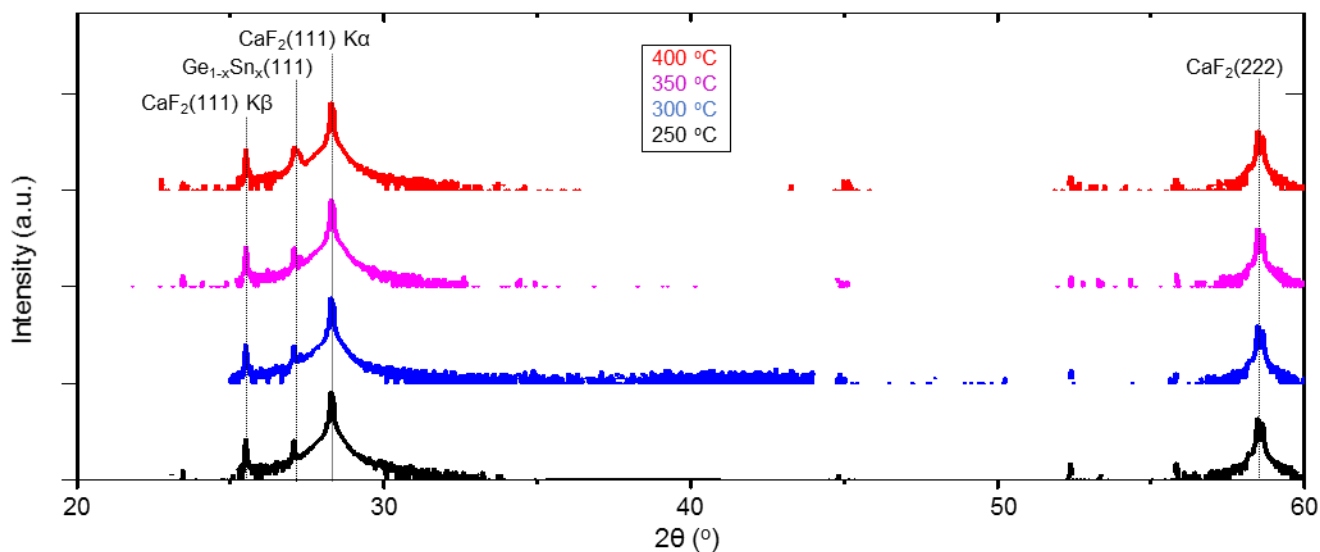

Figure S1. XRD  $\theta/2\theta$  scans of  $\text{Ge}_{1-x}\text{Sn}_x$  films grown on  $\text{CaF}_2(111)$  substrates. Scans are plotted in log scale.

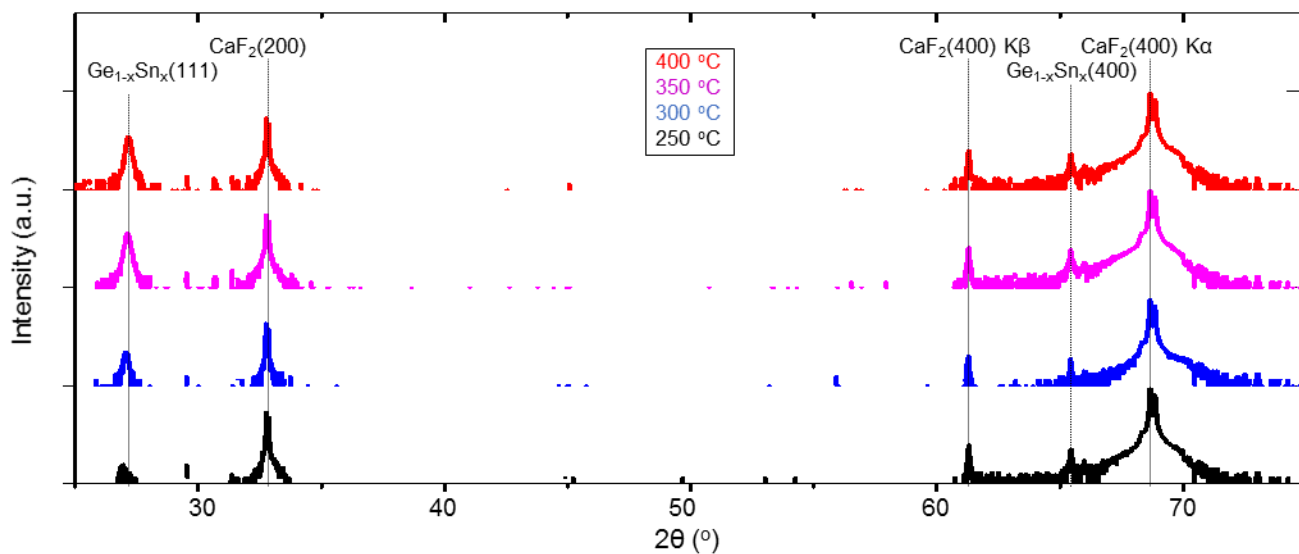

Figure S2. XRD  $\theta/2\theta$  scans of  $\text{Ge}_{1-x}\text{Sn}_x$  films grown on  $\text{CaF}_2(100)$  substrates. Scans are plotted in log scale.

Note: Scans are plotted in logarithmic scale – if zero counts are recorded at a given  $2\theta$  position, no signal will show up in log scale.
